# Supplementary material
Source: publisher figshare collection journal article supplement (https://sage.figshare.com/ndownloader/files/12442739)
Supplement: Supplementary file 1 [file 12442739]

**Supplementary Table 1.** Cost comparison based on discogram use for the treatment of lower back pain with positive discogram at L4-L5 (Scenario 3).

| Discogram Use | Average Cost Comparison | *P*-value |
| --- | --- | --- |
| Never vs Rarely  Sometimes  Often | $3,471 vs $8,404  $16,677  $19,243 | <0.001*  <0.001*  <0.001* |
| Rarely vs Sometimes  Often | $8,404 vs $16,677  $19,243 | <0.001*  <0.001* |
| Sometimes vs Often | $16,677 vs $19,243 | 0.178 |

*statistically significant at *P* < 0.01

**Supplementary Table 2.** Cost comparison based on discogram use for the treatment of lower back pain with positive discogram at L4-L5 and L5-S1 (Scenario 4).

| Discogram Use | Average Cost Comparison | *P*-value |
| --- | --- | --- |
| Never vs Rarely  Sometimes  Often | $3,587 vs $7,686  $15,491  $19,519 | 0.003*  <0.001*  <0.001* |
| Rarely vs Sometimes  Often | $7,686 vs $15,491  $19,519 | <0.001*  <0.001* |
| Sometimes vs Often | $15,491vs $19,519 | 0.070 |

*statistically significant at *P* < 0.01
